# Supplementary material for: Anatomo-proteomic characterization of human basal ganglia: focus on striatum and globus pallidus
Source: PubMed Central journal article supplement (PMC4236423; doi:10.1186/s13041-014-0083-9), 2014-11-18
Supplement: 13041_2014_83_MOESM7_ESM.pdf [file 13041_2014_83_MOESM7_ESM.pdf]

**Anatomo-Proteomic Characterization of Human Basal Ganglia:  
Focus on striatum and Globus Pallidus**

Joaquín Fernández-Irigoyen<sup>1</sup>, María Victoria Zelaya<sup>2</sup>, Teresa Tuñón<sup>3</sup>, Enrique Santamaría<sup>1\*</sup>

<sup>1</sup>*Proteomics Unit, Clinical Neuroproteomics Group, Navarrabiomed, Fundación Miguel Servet, Pamplona, Spain*

<sup>2</sup>*Neurological Tissue Bank, Navarrabiomed, Fundación Miguel Servet, 31008 Pamplona, Spain*

<sup>3</sup>*Pathological Anatomy Department, Navarra Hospital Complex, Pamplona, Spain*

| <b>Case</b> | <b>Sex</b> | <b>Age</b> | <b>Macroscopy analysis</b> | <b>PMI (hours)</b> | <b>Immunohistochemistry analysis (Tau, <math>\beta</math>-amyloide, TDP43, PrP, <math>\alpha</math>-syn, Ub, <math>\alpha\beta</math> cryst)</b> | <b>Diagnostic</b> |
|-------------|------------|------------|----------------------------|--------------------|--------------------------------------------------------------------------------------------------------------------------------------------------|-------------------|
| BCN 34      | M          | 54         | normal                     | 3.25               | negative                                                                                                                                         | control           |
| BCN 115     | M          | 54         | normal                     | > 8                | negative                                                                                                                                         | control           |
| BCN 169     | M          | 41         | normal                     | 3.5                | negative                                                                                                                                         | control           |
| BCN 174     | M          | 29         | normal                     | 7                  | negative                                                                                                                                         | control           |
| BCN 251     | M          | 53         | normal                     | 7                  | negative                                                                                                                                         | control           |
| BCN 294     | M          | 61         | normal                     | 8                  | negative                                                                                                                                         | control           |

**Supporting figure 1:** General characteristics of the subjects included in the proteomic study

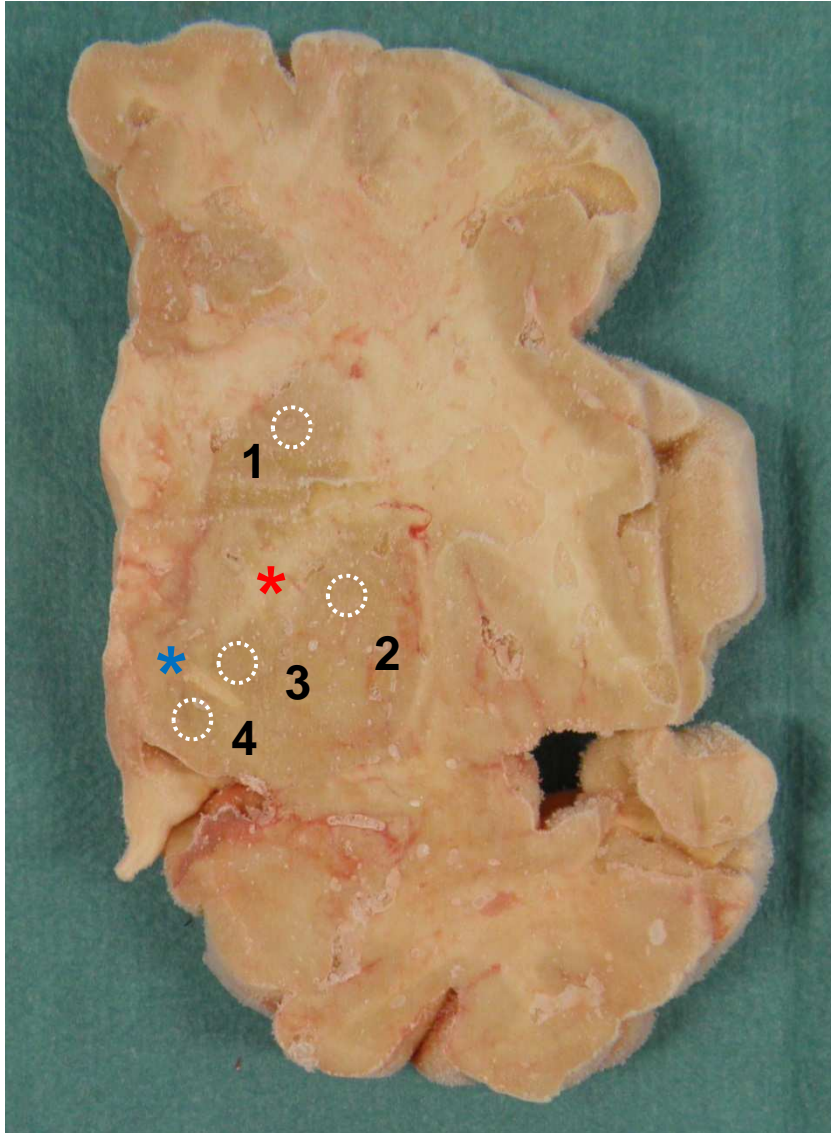

**Supporting figure 2: A representative image of BG structures analyzed in this study.** The internal capsule and the medial medullary lamina are indicated as a reference. 1) Caudate nucleus, 2) Putamen, 3) Lateral globus pallidus (external), 4) Medial globus pallidus (internal)

\*) internal capsule

\*) Medial medullary lamina



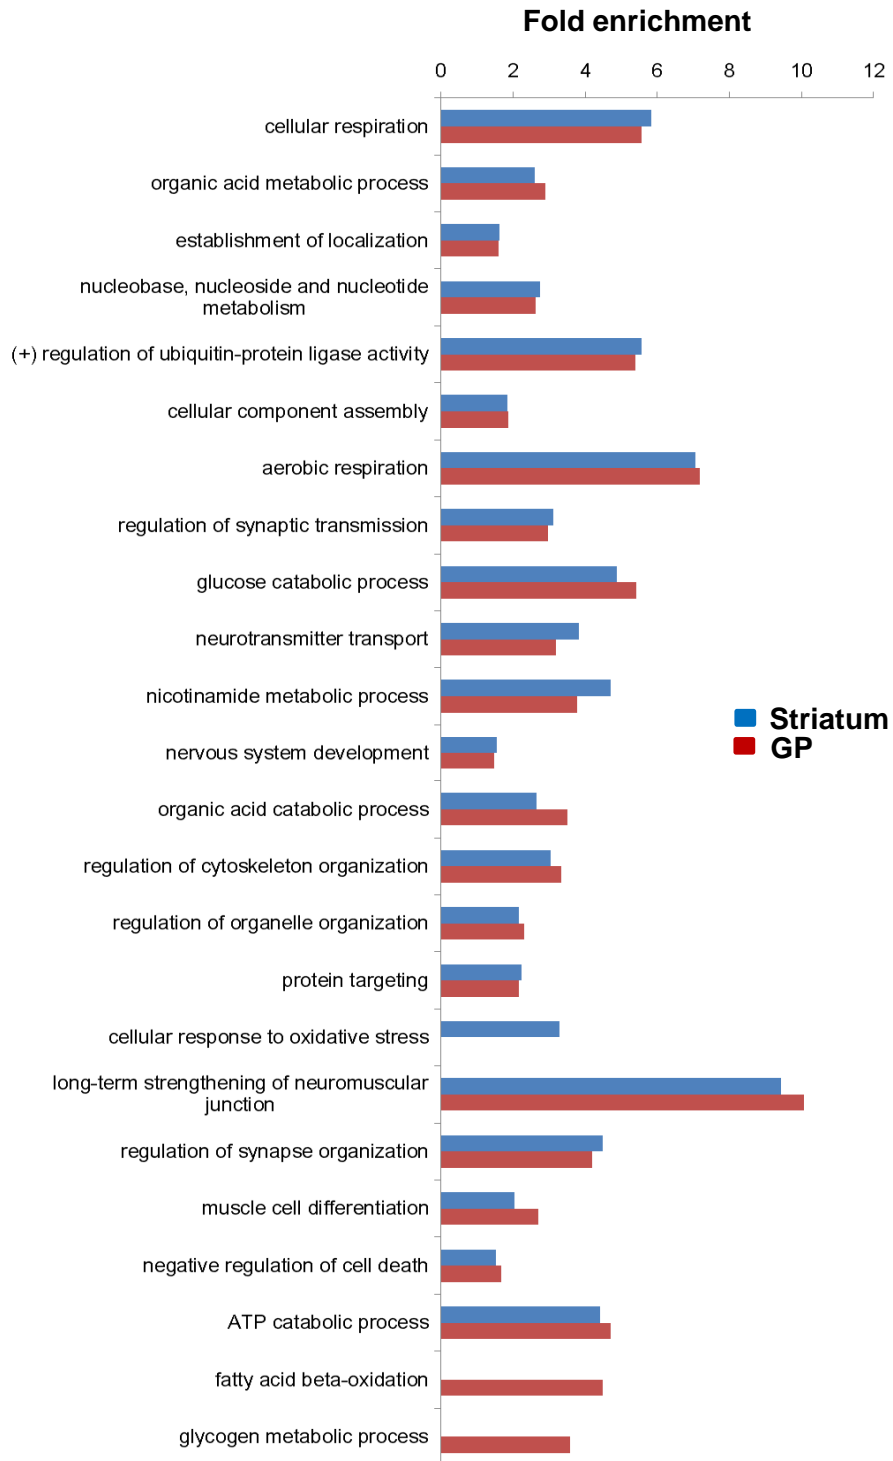

**Supporting figure 4:** Biological Process Ontology for the striatal and pallidal proteomic expression profiles. Representative enriched GO biological process terms from 24 significantly annotation clusters are shown (fold enrichment > 1.5, EASE p-value <0.01). Fold enrichment refers to the number of relevant basal ganglia protein species represented in each category relative to random expression of all genes in the human genome. A complete characterization of each cluster is shown in supplementary table 9.



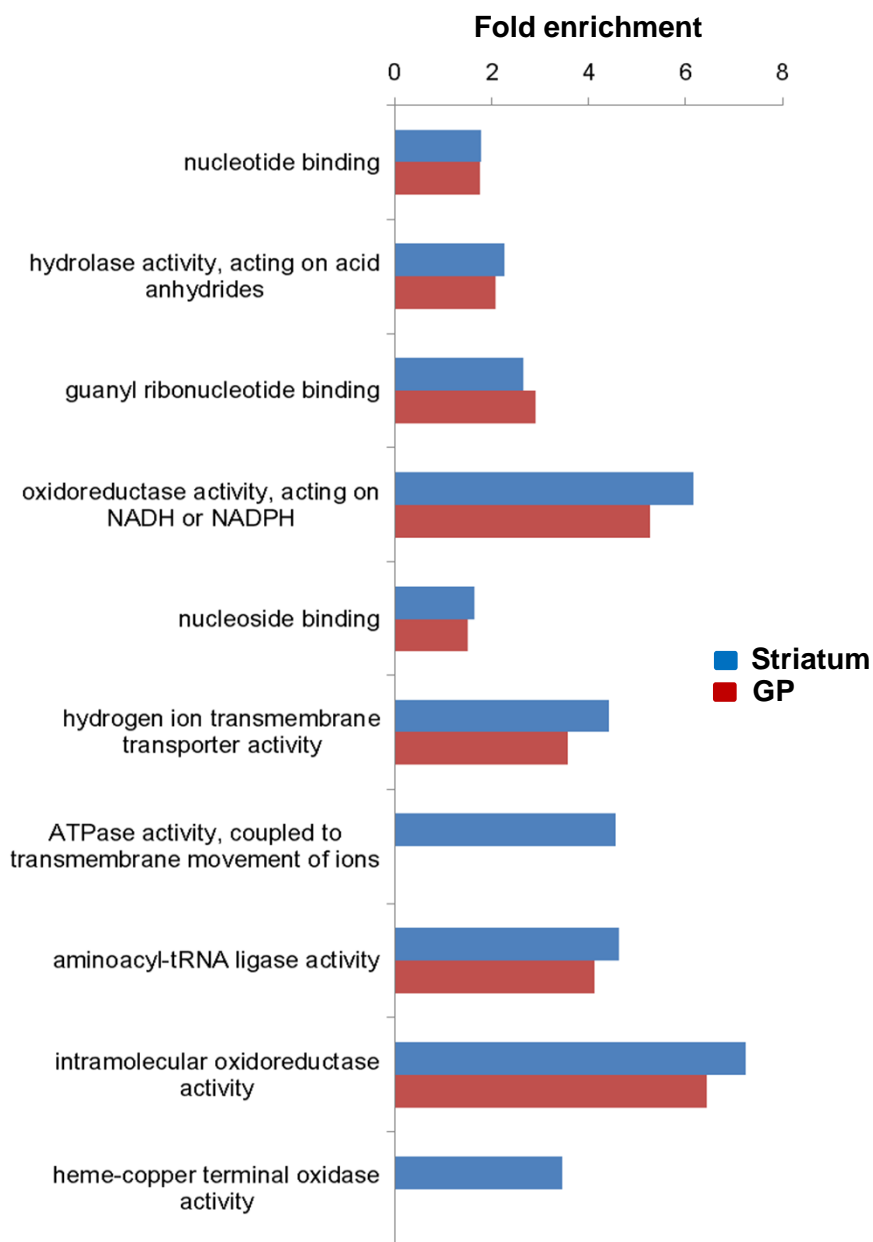

**Supporting figure 5:** Molecular Function Ontology for the striatal and pallidal proteomic expression profiles. Representative enriched GO molecular function terms from 10 significantly annotation clusters are shown (fold enrichment > 1.5, EASE p-value <0.01). Fold enrichment refers to the number of relevant basal ganglia protein species represented in each category relative to random expression of all genes in the human genome. A complete characterization of each cluster is shown in supplementary table 10.

**A**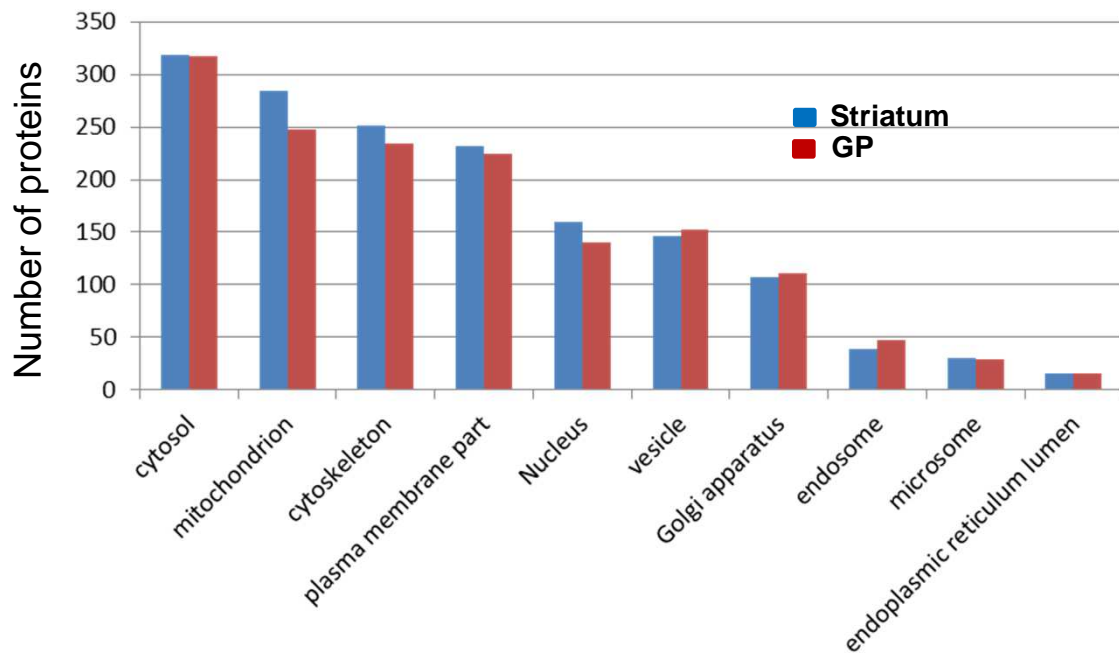**B**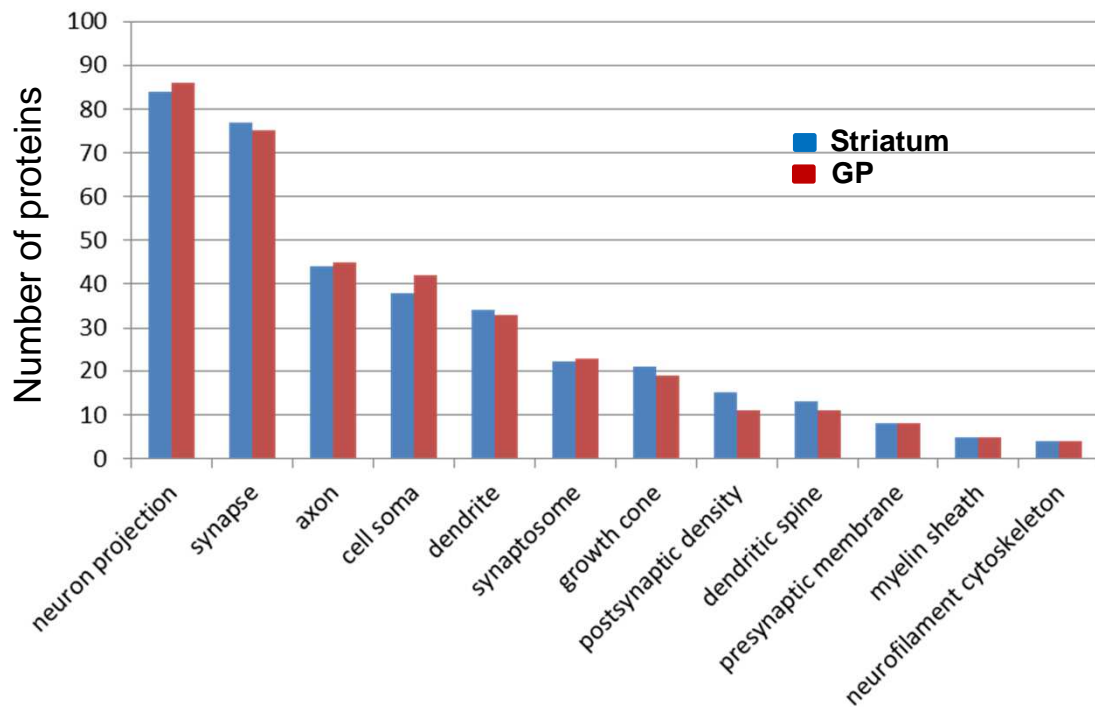

**Supporting figure 6:** Cellular Component Ontology for the striatal and pallidal proteomic expression profiles. A) Classification of BG proteomes based on cellular localization. B) Neuron-specific localization detected by DAVID software (see supplementary table 10).
